# Supplementary material for: Additional Nitrogen Fertilization at Heading Time of Rice Down-Regulates Cellulose Synthesis in Seed Endosperm
Source: PubMed Central journal article supplement (PMC4048278; doi:10.1371/journal.pone.0098738), 2014-06-06
Supplement: pone.0098738.s001.pdf [file pone.0098738.s001.pdf]

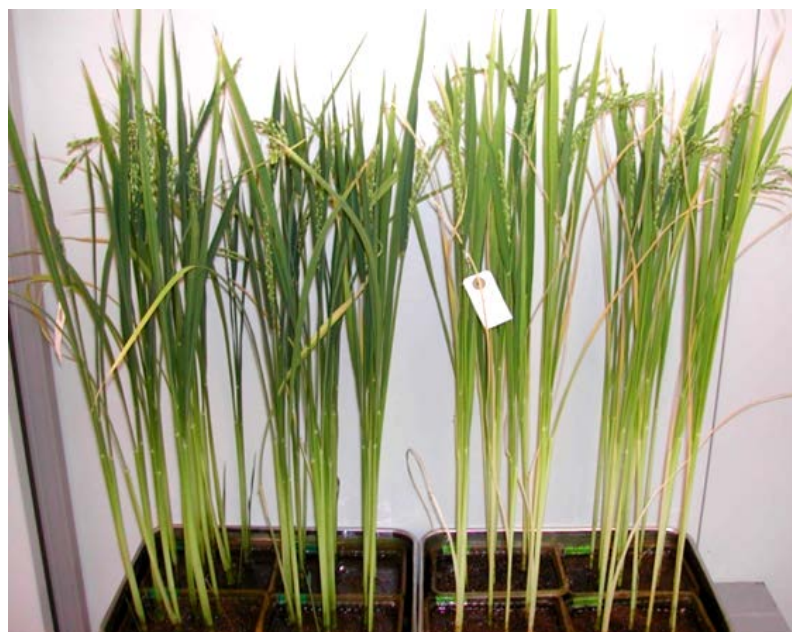

Add  $\text{NH}_4\text{Cl}$

Control

**Figure S1. Rice of 10 days after additional nitrogen fertilization.**
